# Supplementary material for: The Effect of Different Condition of Pulpal Pressure on Microtensile Bond Strength of Several Dentin Bonding Agents on Deep and Superficial Dentin
Source: MDPI journal article supplement (doi:10.3390/ma14206200), 2021-10-19
Supplement: s1 [file s1]

**Table S1.** List of dentin bonding agents (DBAs) investigated, their compositions and pH values.

| DBAs                                                   | Chemical Composition                                                                                                                                                                                                                                                | pH Value |
|--------------------------------------------------------|---------------------------------------------------------------------------------------------------------------------------------------------------------------------------------------------------------------------------------------------------------------------|----------|
| Clearfil S3-Bond<br>Kuraray Medical Inc., Tokyo, Japan | 2-hydroxyethyl methacrylate<br>Bis-phenol A diglycidylmethacrylate<br>10-Methacryloyloxydecyl dihydrogen phosphate<br>Silanated colloidal silica<br>dl-Camphorquinone<br>Ethyl alcohol<br>Water                                                                     | 2.7      |
| G-Bond<br>GC Corp., Tokyo, Japan                       | 4-methacryloxyethyltrimellitate anhydride<br>Triethylene glycol dimethacrylate<br>Urethane dimethacrylate<br>Acetone<br>Water                                                                                                                                       | >2       |
| Clearfil Protect Bond<br>Kuraray Medical Inc.          | 10-Methacryloyloxydecyl dihydrogen phosphate<br>Bis-phenol A diglycidylmethacrylate<br>2-hydroxyethyl methacrylate<br>Hydrophobic dimethacrylate<br>dl-Camphorquinone<br>N,N-Diethanol-p-toluidine<br>Silanated colloidal silica<br>Surface treated sodium fluoride | ~2       |
| Scotchbond 1 XT<br>3M-ESPE, St Paul, USA               | Bis-GMA<br>2-hydroxyethyl methacrylate<br>Hydrophobic dimethacrylate<br>Polyalkenoic acid copolymer<br>Ethyl alcohol<br>Water                                                                                                                                       | 5        |
| Bond Force<br>Tokujama Dental, Tokyo, Japan            | AlcoholC2-4 alkil<br>Methacryloyloxyalkyl acid phosphate<br>2-Hydroxyethyl methacrylate<br>Bis-GMA<br>Triethylene glycol dimethacrylate<br>Camphorquinone<br>Purified water                                                                                         | 2.3      |

**Table S2.** Application procedures for the four DBAs investigated in the study.

| DBAs                  | Application Mode                                                                                                                                                                                                    | Adhesive Classification      |
|-----------------------|---------------------------------------------------------------------------------------------------------------------------------------------------------------------------------------------------------------------|------------------------------|
| G-Bond                | The DBA was applied in one coat using the micro-tip applicator and left undisturbed for 10 sec. It was dried thoroughly for 5 sec with oil-free air under maximum air pressure. Then it was light-cured for 20 sec. | One-step self-etching system |
| Clearfil S3-Bond      | The DBA was applied to dentin for 20 sec. It was air dried for 5 sec to evaporate the solvent. Then it was light-cured for 20 sec.                                                                                  | One-step self-etching system |
| Clearfil Protect Bond | Primer was applied in two consecutive coats and left undisturbed for 20 sec, then the solvent was evaporated for 10 sec.                                                                                            | Two-step self-etching system |

|                 |                                                                                                                                                                   |                              |
|-----------------|-------------------------------------------------------------------------------------------------------------------------------------------------------------------|------------------------------|
|                 | Bonding was applied in two consecutive coats and spread using a gentle stream of oil free air for 2 sec. Then it was light cure for 20 sec.                       |                              |
| Scotchbond 1 XT | DBA was applied in two consecutive coats and spread using a gentle stream of oil free air for 5 sec. to evaporate the solvent. Then it was light-cured for 20 sec | Two-step total etch system   |
| Bond Force      | The DBA was applied to dentin for 20 sec. It was air dried for 5 sec to evaporate the solvent. Then it was light-cured for 20 sec.                                | One-step self-etching system |
